# Supplementary material for: CRISPR/Cas9 mediated high efficiency knockout of the eye color gene Vermillion in Helicoverpa zea (Boddie)
Source: PubMed Central journal article supplement (PMC5957398; doi:10.1371/journal.pone.0197567), 2018-05-17
Supplement: pone.0197567.s001.pdf [file pone.0197567.s001.pdf]

**S1 Fig. Alignment of tryptophan 2,3-dioxygenase (TO) polypeptide sequences from various insect species.** TO polypeptide sequences from *Heliothis virescens* (PCG74852.1), *Spodoptera litura* (XP\_022823393.1), *Plodia interpunctella* (AAR24625.1), *Bicyclus anynana* (XP\_023952864.1), *Papilio polytes* (XP\_013141355.1), *Bombyx mori* (XP\_004922659.1), *Anopheles darlingi* (ETN63322.1), *Anopheles gambiae* (XP\_312204.2), *Aedes aegypti* (AAL37360.1), *Neodiprion lecontei* (XP\_015514842.1), and *Zootermopsis nevadensis* (XP\_021924784.1) were downloaded from National Center for Biotechnology Information and aligned using AlignX module of Vector NTI Advance 11.5 suite (Invitrogen). Identical amino acids are indicated by red text with yellow background. A block of similar amino acids are shown in black text with green background, conservative amino acids are shown in dark blue text, and non-similar amino acids are shown in black text. Alignment gaps are indicated by a hyphen (-). Tryptophan dioxygenase domain is underlined.

|                          |       |                                                                                            |     |
|--------------------------|-------|--------------------------------------------------------------------------------------------|-----|
|                          | 1     |                                                                                            | 80  |
| <i>H. zea</i>            | (1)   | -MACPMRSALDESMACQEGDCILGNEAGMLYGEYLMLDKLLSAQRMLSAESSKP-VHDEHLFIVTHQAYELWFKQIIFEVDS         |     |
| <i>S. litura</i>         | (1)   | -MACPMRSMMDSSAQQEGNHILGNEAGMLYGEYLMLDKLLSAQRMLSAESSKP-VHDEHLFIVTHQAYELWFKQIIFEVDS          |     |
| <i>B. mori</i>           | (1)   | -MACPMRSALDEINGQEGAHILGNEAGMLYGEYLMLDKLLSAQRMLSAESSKP-VHDEHLFIVTHQAYELWFKQIIFEVDS          |     |
| <i>H. virescens</i>      | (1)   | -MACPMRSVMDDSTAQEGNHILGNEAGMLYGEYLMLDKLLSAQRMLSAESSKP-VHDEHLFIVTHQAYELWFKQIIFEVDS          |     |
| <i>P. interpunctella</i> | (1)   | -MACPMRSMNDS--QGGSCILGNEAGMLYGEYLMLDKLLSAQRMLSAESSKP-AHDEHLFIVTHQAYELWFKQIIFEVDS           |     |
| <i>P. polytes</i>        | (1)   | -MACPMRSVMDDSGAQEGSHILGNEAGMLYGEYLMLDKLLSAQRMLSAESSKP-VHDEHLFIVTHQAYELWFKQIIFEVDS          |     |
| <i>B. anynana</i>        | (1)   | -MACPMRSVTDSSAQEGDHLILGNEAGMLYGEYLMLDKLLSAQRMLSAESSKP-VHDEHLFIVTHQAYELWFKQIIFEVDS          |     |
| <i>A. aegypti</i>        | (1)   | -MSCPVGHNHGDP--QGGQRLGSEAGMLYGEYLMLDKLLSAQRMLSVESNKP-VHDEHLFIVTHQAYELWFKQIIFELDS           |     |
| <i>A. darlingi</i>       | (1)   | -MSCPVRSCFVDS-VQGGHHLGSEAGMLYGEYLMLDKLLSAQRMLSVEGKKP-VHDEHLFIVTHQAYELWFKQIIFELDS           |     |
| <i>A. gambiae</i>        | (1)   | -MSCPMRSCFVDS-VQGGHHLGSEAGMLYGEYLMLDKLLSAQRMLSVEGKKP-VHDEHLFIVTHQAYELWFKQIIFELDS           |     |
| <i>Z. navadensis</i>     | (1)   | MNSCVFTNGTDIS--QGEDQLDQGAGMLYGEYLQLDKILNQAQRMLSARTNHP-VHDEHLFIVTHQAYELWFKQIIFELDS          |     |
| <i>N. lecontei</i>       | (1)   | -MACPMRNGGEGDTSCQEGDQLTEGPMGLYGEYLRLLKLLSAQRMLSAESSKP-VHDEHLFIVTHQAYELWFKQIIFELDS          |     |
|                          | 81    |                                                                                            | 160 |
| <i>H. zea</i>            | (79)  | <u>VRALLDVE--GLDESHTMEILKRLNRIVLILKLLVDQVMILETMTPLDFMDFRNYLRPASGFQSLQFRLLFNKLGKQAL</u>     |     |
| <i>S. litura</i>         | (79)  | <u>VRALLDVE--GLDESHTMEILKRLNRIVLILKLLVDQVMILETMTPLDFMDFRNYLRPASGFQSLQFRLLFNKLGKQAL</u>     |     |
| <i>B. mori</i>           | (79)  | <u>VRALLNVE--GLDESHTMEILKRLNRIVLILKLLVDQVMILETMTPLDFMDFRHYLRPASGFQSLQFRLLFNKLGKQAL</u>     |     |
| <i>H. virescens</i>      | (79)  | <u>VRALLDVE--GLDESHTMEILKRLNRIVLILKLLVDQVMILETMTPLDFMDFRNYLRPASGFQSLQFRLLFNKLGKQAL</u>     |     |
| <i>P. interpunctella</i> | (77)  | <u>VRSLLDVE--GLDESHTMEILKRLNRIVLILKLLVDQVMILETMTPLDFMDFRNYLRPASGFQSLQFRLLFNKLGKQAL</u>     |     |
| <i>P. polytes</i>        | (79)  | <u>VRSLLDVE--GLDEGHTMEILKRLNRIVLILKLLVDQVMILETMTPLDFMDFRHYLRPASGFQSLQFRLLFNKLGKQAL</u>     |     |
| <i>B. anynana</i>        | (78)  | <u>VRTLLDVE--GLDESHTMEILKRLNRIVLILKLLVDQVMILETMTPLDFMDFRHYLRPASGFQSLQFRLLFNKLGKQAL</u>     |     |
| <i>A. aegypti</i>        | (77)  | <u>IRSLFSTE--HMEESRTLEILKRLNRIVMILKLLVDQVPILETMTPLDFMDFRDYLRPASGFQSLQFRLLFNKLGKTEH</u>     |     |
| <i>A. darlingi</i>       | (78)  | <u>IRVLFSTE--HIEESRTLEILKRLNRIVMILKLLVDQVPILETMTPLDFMDFRDYLRPASGFQSLQFRLLFNKLGKSEH</u>     |     |
| <i>A. gambiae</i>        | (78)  | <u>IRDLFSTE--HIEESRTLEILKRLNRIVMILKLLVDQVPILETMTPLDFMDFRDYLRPASGFQSLQFRLLFNKLGKSEH</u>     |     |
| <i>Z. navadensis</i>     | (78)  | <u>IRAKFNTEDLVDESQSEIILKRLNRIVLILKLLVDQVMILETMTPLDFMDFRNYLRPASGFQSLQFRLLFNKLGKQEH</u>      |     |
| <i>N. lecontei</i>       | (80)  | <u>VRALFNTE--GLDESRTLEILKRLNRIVLILKLLVDQVMILETMTPLDFMDFRDYLRPASGFQSLQFRLLFNKLGKQEH</u>     |     |
|                          | 161   |                                                                                            | 240 |
| <i>H. zea</i>            | (157) | <u>RVKYNQSYQTVFGDDPEAMDALQKSEGEPAALLALIERWLERTPGLITHGFNFWGKFOAAVNKLIKDDIDAAARETNETVR</u>   |     |
| <i>S. litura</i>         | (157) | <u>RVKYNQSYQTVFGDDPEAMALHKSSEGEPAALLALIERWLERTPGLNTHGFNFWGKFOAAVSKLIKDDIDAAASHETNETVR</u>  |     |
| <i>B. mori</i>           | (157) | <u>RVKYNQNYQTVFGDDPEAMDALQKSEGEPAALLALIERWLERTPGLNTHGFNFWGKFOATVNKMLKIDIEATANLESIIVAVR</u> |     |
| <i>H. virescens</i>      | (157) | <u>RVKYNQSYQNVFGDDPEAMDALQKSEGEPAALLALIERWLERTPGLTRGFNFWGKFOAAVTKLIKDDIDAAANETNETVR</u>    |     |
| <i>P. interpunctella</i> | (155) | <u>RVKYNQNYQTVFGDDPEAMDALHKSSEEPALLALIERWLERTPGLQTHGFNFWGKFOAAVNKLIKDDIDAAAMTEPNETVR</u>   |     |
| <i>P. polytes</i>        | (157) | <u>RVKYNQNYQTVFGDDPEAMESLHKSEEPALLALIERWLERTPGLNTHGFNFWGKFOANVTMIKDDIDEAAMLEPNEVVR</u>     |     |
| <i>B. anynana</i>        | (156) | <u>RVKYNQNYQTVFGDDPEAMDALHKSSEEPALLALIERWLERTPGLITHGFDFWGKFOAAVVKMIRSVVEAMREPNETVR</u>     |     |
| <i>A. aegypti</i>        | (155) | <u>RVKYNQKYSVFAASDPCATIERLSITESEPSLADLVQKWLERTPGLTNGFNFWGKFEESVQQLADQEAASAMEEHEENVK</u>    |     |
| <i>A. darlingi</i>       | (156) | <u>RVKYNQKYTEVFAASDPSAIDRIAVTEEPSLADLVQKWLERTPGLLEDGFNFWGKQESVQKLLSDQEAASAMKEEHEHVR</u>    |     |
| <i>A. gambiae</i>        | (156) | <u>RVKYNQKYTEVFAASDPAIERTIGTETEPSLADLVQKWLERTPGLQDGFNFWGKQESVQQLAQAQEAASAMEEHEENVR</u>     |     |
| <i>Z. navadensis</i>     | (158) | <u>RVKYNQKYSVFGNDPEAIKAKAEKSENEPPLAHLVQRWLERTPGLQDGFNFWGKQKQAVETLLAKQRKTAEEAVNETLR</u>     |     |
| <i>N. lecontei</i>       | (158) | <u>RVKYNQSYTRVFGDDPEAMTALGLAENEPSLSCLVQRWLERTPGLQDGFNFWGKQKQAVETLLAKQRKTAEEAVNETLR</u>     |     |
|                          | 241   |                                                                                            | 320 |
| <i>H. zea</i>            | (237) | <u>RHRLQDAENRREIYRSIFDPAVHDALRSRGERRLSHRALQGAIMITFYRDEPRFSQPHQLTLLMIDSLITKWRYNHVI</u>      |     |
| <i>S. litura</i>         | (237) | <u>RHRLQDAENRREIYRSIFDPAVHDALRSRGERRLSHRALQGAIMITFYRDEPRFSQPHQLTLLMIDSLITKWRYNHVI</u>      |     |
| <i>B. mori</i>           | (237) | <u>RHRLQDVENRREIYRSIFDPAVHDALRSRGERRLSHRALQGAIMITFYRDEPRFSQPHQLTLLMIDSLITKWRYNHVI</u>      |     |
| <i>H. virescens</i>      | (237) | <u>RHRLQDAENRREIYRSIFDPAVHDALRSRGERRLSHRALQGAIMITFYRDEPRFSQPHQLTLLMIDSLITKWRYNHVI</u>      |     |
| <i>P. interpunctella</i> | (235) | <u>RHRLQDAENRREIYRSIFDPAVHDALRSRGERRLSHRALQGAIMITFYRDEPRFSQPHQLTLLMIDSLITKWRYNHVI</u>      |     |
| <i>P. polytes</i>        | (237) | <u>RHRLQDAENRREIYRSIFDPAVHDALRSRGERRLSHRALQGAIMITFYRDEPRFSQPHQLTLLMIDSLITKWRYNHVI</u>      |     |
| <i>B. anynana</i>        | (236) | <u>RHRLQDAENRREIYRSIFDPAVHDALRSRGERRLSHRALQGAIMITFYRDEPRFSQPHQLTLLMIDSLITKWRYNHVI</u>      |     |
| <i>A. aegypti</i>        | (235) | <u>NYRLMDIEKRREIVYSIFDAVVDALVARGERRFTHRALQGAIMITFYRDEPRFSQPHRLMLLMDIDSLITKWRYNHVI</u>      |     |
| <i>A. darlingi</i>       | (236) | <u>EYRLMDIEKRREIVYSIFDAVVDALVARGERRFTHRALQGAIMITFYRDEPRFSQPHQLMLLMDIDSLITKWRYNHVI</u>      |     |
| <i>A. gambiae</i>        | (236) | <u>EYRLMDIEKRREIVYSIFDAVVDALVARGERRFTHRALQGAIMITFYRDEPRFSQPHQLMLLMDIDSLITKWRYNHVI</u>      |     |
| <i>Z. navadensis</i>     | (238) | <u>QHRFMDYEKRREIENSIFDPTTHAALVSRGERRFSHRALQGAIMITFYRDEPRFNQPHQLTLLMIDSLITKWRYNHVI</u>      |     |
| <i>N. lecontei</i>       | (238) | <u>NHRLSDISSRAVEEITIFNEALHDALVSRGERRFTHAALQGAIMITLYRDEPRFSQPHQLTLLMIDSLITKWRYNHVI</u>      |     |

|                          |       |                                                                   |                          |
|--------------------------|-------|-------------------------------------------------------------------|--------------------------|
|                          | 321   |                                                                   | 400                      |
| <i>H. zea</i>            | (317) | MVORMIGSQQLGTGGSSGYQYLRSTLSDRYKVFLDLFNLSTFLPRSLIPPLDDGMKRSLNLTWGD | SVK----ENGQNGD           |
| <i>S. litura</i>         | (317) | MVQRMIGSQQLGTGGSSGYQYLRSTLSDRYKVFLDLFNLSTFLPRSLIPPLDDNMKKS        | LTWGDKENG---QNMQNGA      |
| <i>B. mori</i>           | (317) | MVQRMIGSQQLGTGGSSGYQYLRSTLSDRYKVFLDLFNLSTFLPRSLIPPLDDGMKRS        | LNLTWGDNVR-----ENGD      |
| <i>H. virescens</i>      | (317) | MVQRMIGSQQLGTGGSSGYQYLRSTLSDRYKVFLDLFNLSTFLPRSLIPPLDDGMKRS        | LNLTWGDIVK----ENGQNGD    |
| <i>P. interpunctella</i> | (315) | MVQRMIGSQQLGTGGSSGYQYLRSTLSDRYKVFLDLFNLSTFLPRSLIPPLDDGMKRS        | LNLTWGDNAR-----ENGK      |
| <i>P. polytes</i>        | (317) | MVQRMIGSQQLGTGGSSGYQYLRSTLSDRYKVFLDLFNLSTFLPRSLIPPLDDGMKRS        | LNLTWGDNIK----ENSQNGQ    |
| <i>B. anynana</i>        | (316) | MVQRMIGSQQLGTGGSSGYQYLRSTLSDRYKVFLDLFNLSTFLPRSLIPPLDDG            | IKRDLSLTWGDHIFENGHSAKENG |
| <i>A. aegypti</i>        | (315) | MVQRMIGSQQLGTGGSSGYQYLRSTLSDRYKVFLDLFNLSTFLIPRGSIPPLTC            | EMQKALNLAWGSPVH-----Q    |
| <i>A. darlingi</i>       | (316) | MVQRMIGSQQLGTGGSSGYQYLRSTLSDRYKVFLDLFNLSTFLIPRNTIPPLTNE           | MQKALNLAWGSPAHE-----T    |
| <i>A. gambiae</i>        | (316) | MVQRMIGSQQLGTGGSSGYQYLRSTLSDRYKVFLDLFNLSTFLIPRQSIPLTNE            | MQKALNLAWGSPAHE-----F    |
| <i>Z. navadensis</i>     | (318) | MVQRMIGSAQLGTGGSSGYQYLRSTLSDRYKVFLDLFNLSTFLIPRGYIPPLTRH           | MKSKLSLSRDLIRN---WNDATDS |
| <i>N. lecontei</i>       | (318) | MVQRMIGSQQLGTGGSSGYQYLRSTLSDRYKVFLDLFNLSTFLIPRNLIPLSR             | DMKAKLSGAWGCWGA-----D    |

|                          |       |                           |     |
|--------------------------|-------|---------------------------|-----|
|                          | 401   |                           | 425 |
| <i>H. zea</i>            | (393) | NAQNGDNAQNGIESSL-----     |     |
| <i>S. litura</i>         | (394) | HSQNSQKETNGEGPETTLWQ----  |     |
| <i>B. mori</i>           | (390) | ETTPQNGLEASL-----         |     |
| <i>H. virescens</i>      | (393) | NEQNGIESSF-----           |     |
| <i>P. interpunctella</i> | (388) | ETHDGELNNCMLKLELA-----    |     |
| <i>P. polytes</i>        | (393) | NSQNGLEFL-----            |     |
| <i>B. anynana</i>        | (396) | NKKNGENHQNGLDEFSKLSLNEKKS |     |
| <i>A. aegypti</i>        | (385) | AKQINYAAK-----            |     |
| <i>A. darlingi</i>       | (386) | ATRNGTLH-----             |     |
| <i>A. gambiae</i>        | (386) | ARNGSLH-----              |     |
| <i>Z. navadensis</i>     | (395) | EVDKPLERSVEASI-----       |     |
| <i>N. lecontei</i>       | (388) | DDQNNLESSAEASM-----       |     |
