# Supplementary material for: CRISPR/Cas9 mediated high efficiency knockout of the eye color gene Vermillion in Helicoverpa zea (Boddie)
Source: PubMed Central journal article supplement (PMC5957398; doi:10.1371/journal.pone.0197567), 2018-05-17
Supplement: pone.0197567.s003.pdf [file pone.0197567.s003.pdf]

**S3 Fig. CRISPR RNA (crRNA) designs for *Helicoverpa zea* tryptophan 2,3-dioxygenase (TO) gene exon 6 generated by tools at [crispr.mit.edu](http://crispr.mit.edu). Nucleotide sequences of the crRNA used in the experiments are shown in bold red text followed by protospacer adjacent sequence (PAM) in bold black text.**

```

LOCUS      Hz_TO_Ex6                      145 bp      DNA
DEFINITION guides analysis for job Hz_TO, by op.perera@ars.usda.gov on the web at crispr.mit.edu
ACCESSION 5955886094736145
FEATURES   Location/Qualifiers
     protein_bind complement(14..36)
                /bound_moiety="CRISPR reverse-strand guide #28940829
                TCGATCAGAGCTAGTAGAGCTGG"
                /note="{\"n_genic_offtargets\": 2, \"n_offtargets\": 2,
                \"score\": \"100%\", \"sequence\": \"TCGATCAGAGCTAGTAGAGCTGG\"}"
     protein_bind complement(56..78)
                /bound_moiety="CRISPR reverse-strand guide #28940828
                AACCCGTGAGTCGTGAGGCCGGG"
                /note="{\"n_genic_offtargets\": 2, \"n_offtargets\": 3,
                \"score\": \"100%\", \"sequence\": \"AACCCGTGAGTCGTGAGGCCGGG\"}"
     protein_bind complement(57..79)
                /bound_moiety="CRISPR reverse-strand guide #28940827
                GAACCCGTGAGTCGTGAGGCCGG"
                /note="{\"n_genic_offtargets\": 1, \"n_offtargets\": 1,
                \"score\": \"100%\", \"sequence\": \"GAACCCGTGAGTCGTGAGGCCGG\"}"
     protein_bind complement(61..83)
                /bound_moiety="CRISPR reverse-strand guide #28940826
                AGTTGAACCCGTGAGTCGTGAGG"
                /note="{\"n_genic_offtargets\": 1, \"n_offtargets\": 3,
                \"score\": \"100%\", \"sequence\": \"AGTTGAACCCGTGAGTCGTGAGG\"}"
     protein_bind complement(97..119)
                /bound_moiety="CRISPR reverse-strand guide #28940825
                TGAGTTTGTGACAGCAGCCTGG"
                /note="{\"n_genic_offtargets\": 3, \"n_offtargets\": 4,
                \"score\": \"99%\", \"sequence\": \"TGAGTTTGTGACAGCAGCCTGG\"}"
     protein_bind 18..40
                /bound_moiety="CRISPR forward-strand guide #28940814
                CTCTACTAGCTCTGATCGAGCGG"
                /note="{\"n_genic_offtargets\": 1, \"n_offtargets\": 2,
                \"score\": \"100%\", \"sequence\": \"CTCTACTAGCTCTGATCGAGCGG\"}"
     protein_bind 21..43
                /bound_moiety="CRISPR forward-strand guide #28940815
                TACTAGCTCTGATCGAGCGGTGG"
                /note="{\"n_genic_offtargets\": 0, \"n_offtargets\": 1,
                \"score\": \"100%\", \"sequence\": \"TACTAGCTCTGATCGAGCGGTGG\"}"
     protein_bind 25..47
                /bound_moiety="CRISPR forward-strand guide #28940816
                AGCTCTGATCGAGCGGTGGTTGG"
                /note="{\"n_genic_offtargets\": 1, \"n_offtargets\": 1,
                \"score\": \"100%\", \"sequence\": \"AGCTCTGATCGAGCGGTGGTTGG\"}"
     protein_bind 54..76
                /bound_moiety="CRISPR forward-strand guide #28940819
                CACCCGGCCTCAGACTCACGGG"
                /note="{\"n_genic_offtargets\": 0, \"n_offtargets\": 1,
                \"score\": \"100%\", \"sequence\": \"CACCCGGCCTCAGACTCACGGG\"}"
     protein_bind 67..89
                /bound_moiety="CRISPR forward-strand guide #28940821
                GACTCACGGGTCAACTTCTGGG"
                /note="{\"n_genic_offtargets\": 1, \"n_offtargets\": 2,
                \"score\": \"100%\", \"sequence\": \"GACTCACGGGTCAACTTCTGGG\"}"
     protein_bind 68..90
                /bound_moiety="CRISPR forward-strand guide #28940822
                ACTCACGGGTCAACTTCTGGGG"
                /note="{\"n_genic_offtargets\": 5, \"n_offtargets\": 5,
                \"score\": \"99%\", \"sequence\": \"ACTCACGGGTCAACTTCTGGGG\"}"
     protein_bind 79..101
                /bound_moiety="CRISPR forward-strand guide #28940823
                CAACTTCTGGGGCAAGTTCAGG"
                /note="{\"n_genic_offtargets\": 4, \"n_offtargets\": 9,
                \"score\": \"99%\", \"sequence\": \"CAACTTCTGGGGCAAGTTCAGG\"}"
     protein_bind 103..125
                /bound_moiety="CRISPR forward-strand guide #28940824
                TGCTGTCAACAACTCATTAAAGG"
                /note="{\"n_genic_offtargets\": 7, \"n_offtargets\": 14,
                \"score\": \"98%\", \"sequence\": \"TGCTGTCAACAACTCATTAAAGG\"}"
ORIGIN
1 atcagaacaa gagccagctc tactagctct gatcgagcgg tggttggagc gtacaccgg cctcagcact cacgggttca
81 acttctgggg caagttccag gctgctgca acaaacatcat taaggatgat attgatgctg cttct

```
