# Supplementary material for: CRISPR/Cas9 mediated high efficiency knockout of the eye color gene Vermillion in Helicoverpa zea (Boddie)
Source: PubMed Central journal article supplement (PMC5957398; doi:10.1371/journal.pone.0197567), 2018-05-17
Supplement: pone.0197567.s004.pdf [file pone.0197567.s004.pdf]

**S4 Fig. Alignment of the partial nucleotide sequences of the exon 6 of the TO gene from reference sequence (Ref), uninjected wild type (WT), eye color mutants from CRISPR/Cas9 injections (IM).** Nucleotides identical to the exon 6 of the reference sequence (accession: MF598173) are indicated by a dot (.) and alignment gaps are shown by a hyphen (-). Nucleotide that differ from the reference are indicated on each sequence. CRISPR RNA (crRNA) target sequences and protospacer adjacent motifs (PAM) are underlined with dotted lines and solid lines, respectively.

```

Ref  ATCAGAACAAGAGCCAGCTCTACTAGCTCTGATC-----GAGCGGTGGTGGAGCGTACACCCGGCCTCAC-----GACTCACGGGTCAACT-TCT-GGGGCAAGTT
WT  .....
IM 25 .....
IM 26 .....
IM 27 .....
IM 28 .....
IM 29 .....
IM 30 .....
IM 31 .....
IM 32 .....
IM 33 .....
IM 34 .....
IM 35 .....
IM 36 .....
IM 37 .....
IM 38 .....
IM 39 .....
IM 40 .....
IM 41 .....
IM 42 .....
IM 43 .....
IM 44 .....
IM 45 .....
IM 46 .....
IM 47 .....
IM 48 .....
IM 49 .....
IM 50 .....
IM 51 .....
IM 52 .....
IM 53 .....
IM 54 .....
IM 55 .....
IM 56 .....
IM 57 .....
IM 58 .....
IM 59 .....
IM 60 .....
IM 61 .....
IM 62 .....
IM 63 .....
IM 64 .....
IM 65 .....
IM 66 .....
IM 67 .....
IM 68 .....
IM 69 .....
IM 70 .....
IM 71 .....
IM 72 .....
IM 74 .....
IM 75 .....
IM 76 .....
IM 77 .....
IM 78 .....
IM 79 .....
IM 80 .....
IM 81 .....
IM 82 .....
IM 83 .....
IM 84 .....
IM 85 .....
IM 86 .....

```
